# Supplementary material for: Selective electrochemical reduction of CO2to CO on CuO-derived Cu nanowires
Source: Royal Society of Chemistry journal article supplement (doi:10.1039/c5cp03559g), 2015-01-01
Supplement: c5cp03559g1.pdf [file c5cp03559g1.pdf]

## Supporting Information

### Selective Electrochemical Reduction of CO<sub>2</sub> to CO on CuO-derived Cu Nanowires

Ming Ma<sup>1</sup>, Kristina Djanashvili<sup>2</sup> and Wilson A. Smith<sup>\*1</sup>

<sup>1</sup>Materials for Energy Conversion and Storage, Department of Chemical Engineering, Faculty of Applied Sciences, Delft University of Technology, P.O. Box 5045, 2600 GA Delft, The Netherlands

<sup>2</sup>Biocatalysis, Department of Biotechnology, Faculty of Applied Sciences, Delft University of Technology, P.O. Box 5045, 2600 GA Delft, The Netherlands

**KEYWORDS:** CO<sub>2</sub> reduction, electrochemical reduction of CO<sub>2</sub>, Cu nanowires, faradaic efficiency, CO production

\*Author to whom correspondence should be addressed.

E-mail address: [W.A.Smith@tudelft.nl](mailto:W.A.Smith@tudelft.nl)

Tel.: +31 15 27 82659; Fax: +31 15 27 87421.

**Pt counter electrode**

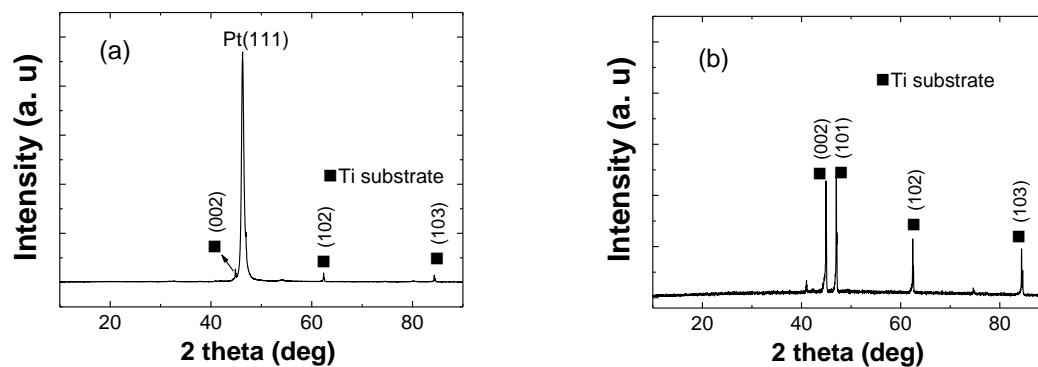

Fig. S1 XRD patterns of Pt film (a) deposited by magnetron sputtering and Ti foil (b).

Pt films (~160 nm) were deposited on Ti foils by using direct current magnetron sputtering (60 W) at 0.3 Pa for 20 min (deposition rate is 0.133 nm/s). The XRD pattern of the Pt film sputtered on Ti foil was shown in Fig. S1 (a). The Pt film coated on Ti foil was used as the counter electrode (anode) in the three-electrode configuration measurement.

### Surface preparation of polycrystalline Cu

It is important to remove impurities on the surface of Cu foil.<sup>1,2</sup> SEM images of the copper electrode surface are displayed after polishing by sandpaper in Fig. S2 (a) and subsequent electropolishing in Fig. S2 (b) in order to have a surface free of impurities. In our study the Cu foils were electropolished at 4.0 V for 5 min in 85% phosphoric acid.<sup>3</sup>

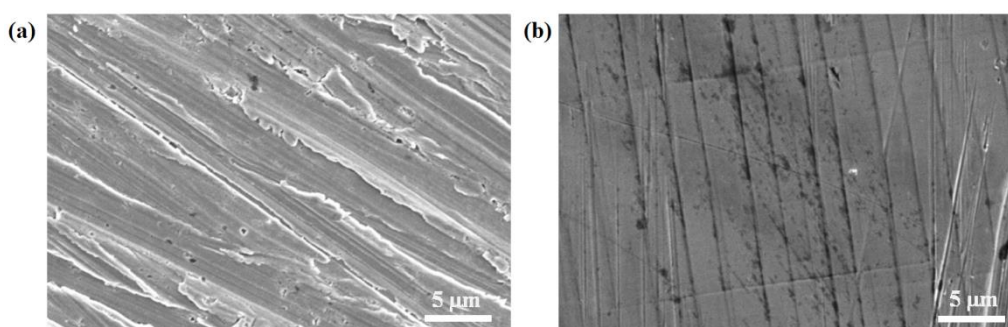

Fig. S2 SEM images of Cu foil before (a) and after (b) electropolishing in 85 % phosphoric acid.

### The annealing temperature and time

Some examples of annealed  $\text{Cu}(\text{OH})_2$  nanowires at different annealing conditions were shown in Fig. S3.

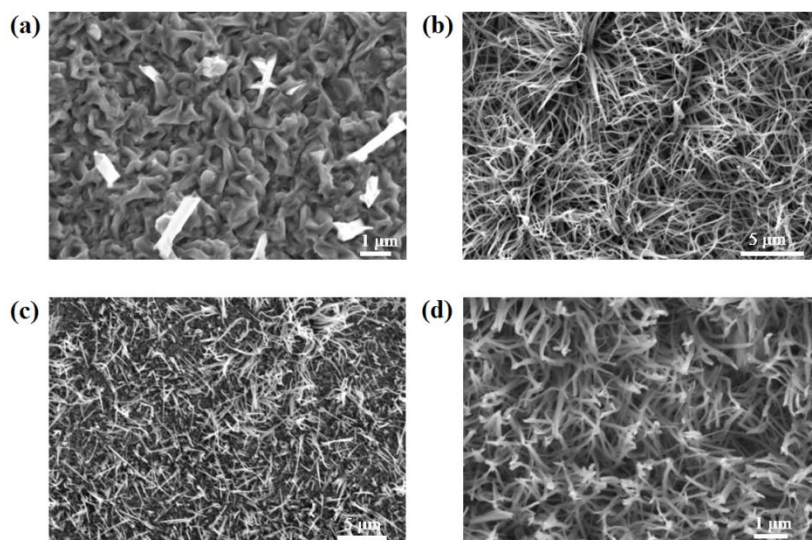

Fig. S3 SEM images of annealed  $\text{Cu}(\text{OH})_2$  nanowires in argon at 500 °C (a) and 300 °C (b) for 1 hour, and in air at 450 °C for 1 hour (c) and 230 °C in air for 2 hours (d), respectively.

#### SEM images of nanowires after electrolysis.

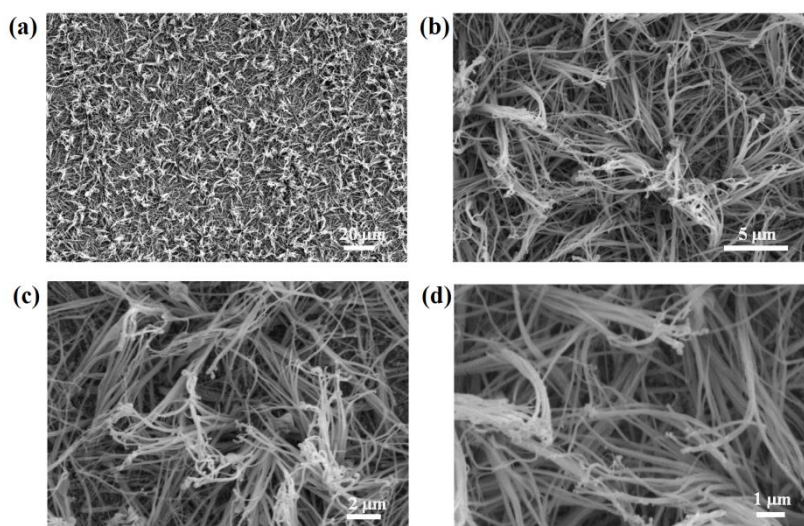

Fig. S4 SEM images of  $\text{CuO}$  nanowires after  $\text{CO}_2$  reduction electrolysis.

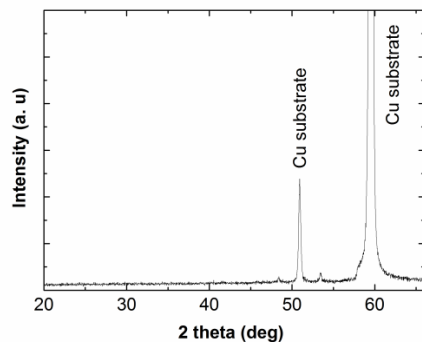

Fig. S5 XRD pattern of the CuO nanowire arrays after CO<sub>2</sub> reduction electrolysis.

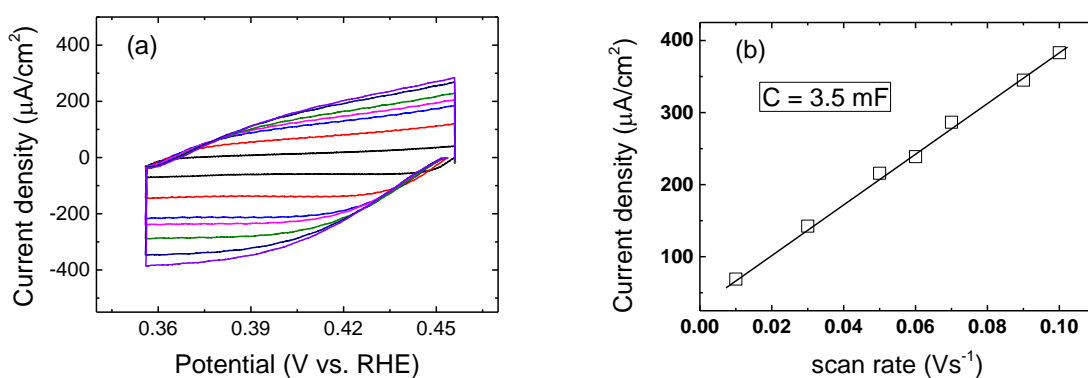

Fig. S6 Determination of double-layer capacitance for the Cu nanowire arrays. (a) the cyclic voltammograms were measured in a non-faradaic region of the voltammogram at the following scan rate: 0.01, 0.03, 0.05, 0.06, 0.07, 0.09 and 0.1 V/s in N<sub>2</sub> bubbled 0.1 M phosphate buffer. The working electrode was held at each potential vertex for 15 s before starting the next sweep. (b) The relationship between the current density and the CV scan rate.

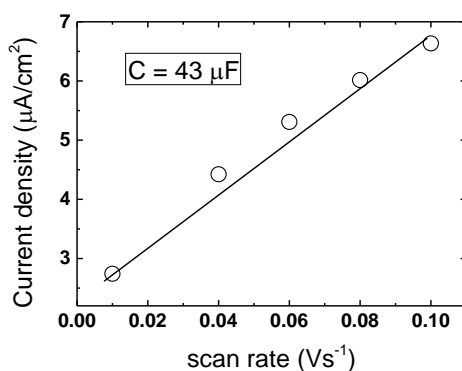

Fig. S7 The relationship between the current density and the CV scan rate for polycrystalline Cu.

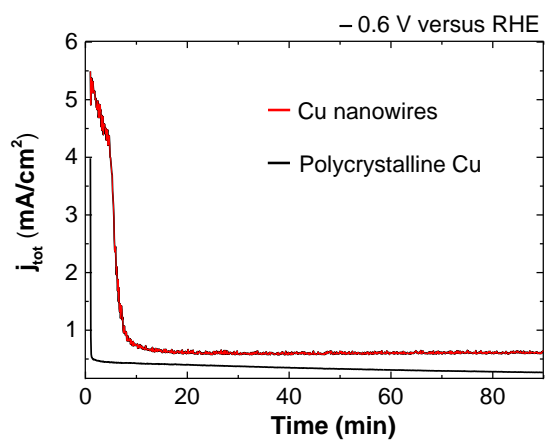

Fig. S8 CO<sub>2</sub> reduction current as a function of time at -0.6 V vs. RHE.

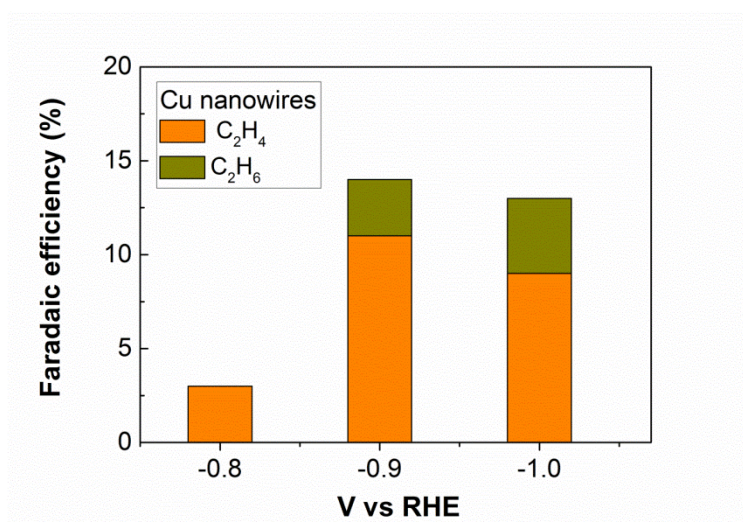

Fig. S9 Faradaic efficiency for C<sub>2</sub>H<sub>4</sub> and C<sub>2</sub>H<sub>6</sub> at various potentials in CO<sub>2</sub>-saturated 0.1 M KHCO<sub>3</sub> electrolytes at ambient temperature and pressure.

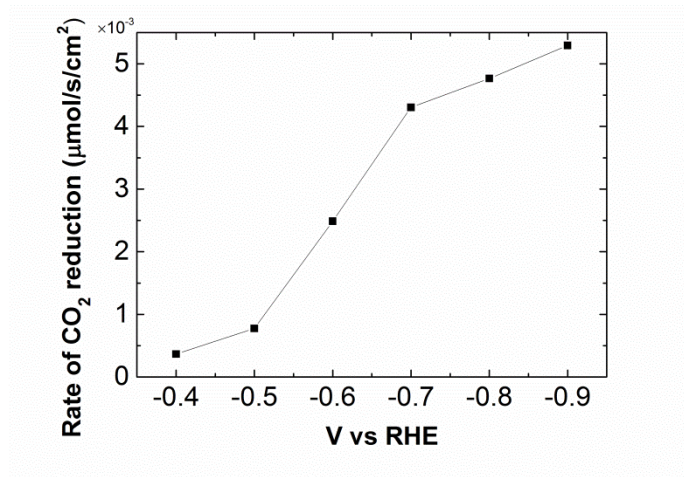

Fig. S10 Total rate of CO<sub>2</sub> reduction as a function of potentials.

The total rate of CO<sub>2</sub> reduction is calculated at a given potential as follow:

$$RR_{CO_2} = \frac{J_{CO}}{2F} + \frac{J_{HCOOH}}{2F} + \frac{J_{C_2H_4}}{6F} + \frac{J_{C_2H_6}}{7F} \quad (1)$$

where  $J_{CO}$ ,  $J_{HCOOH}$ ,  $J_{C_2H_4}$  and  $J_{C_2H_6}$  are the partial current density for each reduction product (CO, HCOOH, C<sub>2</sub>H<sub>4</sub> and C<sub>2</sub>H<sub>6</sub>) of CO<sub>2</sub>, and F is the faraday constant. The partial current density for each reduction product of CO<sub>2</sub> is calculated through multiplying the total geometric current density by the faradaic efficiency for each product at a given potential.

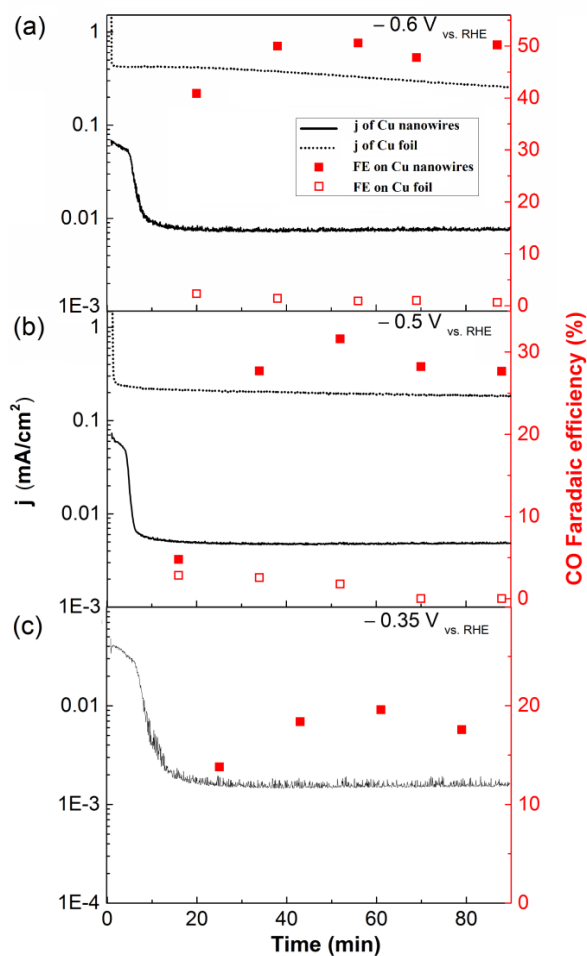

Fig. S11 CO<sub>2</sub> reduction performance of CuO-derived Cu nanowires. CO<sub>2</sub> reduction activity of CuO-derived Cu nanowires and polycrystalline Cu at (a) -0.6 V and (b) -0.5 V, and CuO-derived Cu nanowires at (c) -0.35 V vs. RHE in CO<sub>2</sub>-saturated 0.1 M KHCO<sub>3</sub> electrolytes (no CO production was observed for polycrystalline Cu at -0.35 V vs. RHE). The logarithm of current density (current density on Cu nanowires is normalized by measured surface roughness in Fig. S9) is shown on the left axis and the faradaic efficiency for CO is shown on the right axis (■ and □ represent CO faradaic efficiency on Cu nanowires and Cu foil respectively).

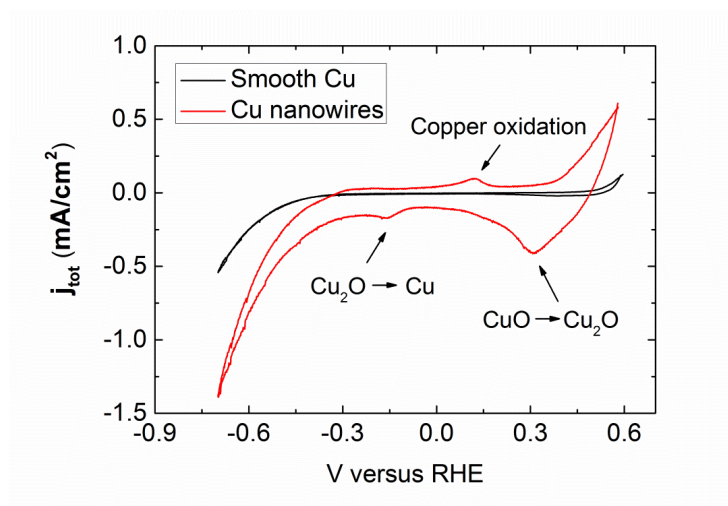

Fig. S12 Cyclic voltammetry (CV) of smooth Cu and Cu nanowire arrays in CO<sub>2</sub>-saturated 0.1 M KHCO<sub>3</sub> electrolytes at ambient temperature and pressure (scan rate is 0.02 V/s).

## References

- (1) Kuhl, K. P.; Cave, E. R.; Abram, D. N.; Jaramillo, T. F. *Energy Environ. Sci.* **2012**, *5*, 7050.
- (2) Gattrell, M.; Gupta, N.; Co, A. *J. Electroanal. Chem.* **2006**, *594*, 1–19.
- (3) Li, C. W.; Kanan, M. W. *J. Am. Chem. Soc.* **2012**, *134* 7231–7234.
